# Supplementary material for: α-Amylase and α-Glucosidase Inhibitory Activities of Chemical Constituents from Wedelia chinensis (Osbeck.) Merr. Leaves
Source: Hindawi journal article supplement (doi:10.1155/2018/2794904), 2018-01-01
Supplement: f1 [file 2794904.f1.pdf]

## SUPPORTING INFORMATION

### **$\alpha$ -Amylase and $\alpha$ -Glucosidase Inhibitory Activities of Chemical Constituents from *Wedelia chinensis* (Osbeck.) Merr. Leaves**

Nguyen Phuong Thao,<sup>1,\*</sup> Pham Thanh Binh,<sup>1</sup> Nguyen Thi Luyen,<sup>1,2</sup> Ta Manh Hung,<sup>3</sup>  
Nguyen Hai Dang,<sup>1,2</sup> Nguyen Tien Dat<sup>2,4,\*</sup>

<sup>1</sup> *Advanced Center for Bio-organic Chemistry, Institute of Marine Biochemistry (IMBC), Vietnam Academy of Science and Technology (VAST), 18 Hoang Quoc Viet, Cau Giay, Hanoi, Vietnam*

<sup>2</sup> *Graduate University of Science and Technology, VAST, 18 Hoang Quoc Viet, Cau Giay, Hanoi, Viet Nam*

<sup>3</sup> *National Institute of Drug Quality Control (NIDQC), 48 Hai Ba Trung, Hoankiem, Hanoi, Vietnam*

<sup>4</sup> *Center for Research and Technology Transfer, VAST, 18 Hoang Quoc Viet, Cau Giay, Hanoi, Viet Nam*

\* Correspondence should be addressed to:

Tel: +84 4 37917053; Fax: +84 4 37917054; *E-mail addresses:* [thaonp@imbc.vast.vn](mailto:thaonp@imbc.vast.vn) (N.P. Thao),  
[ngtiend@imbc.vast.vn](mailto:ngtiend@imbc.vast.vn) (N.T. Dat).

## List of Content

| Cotents                                                                                                        | Pages |
|----------------------------------------------------------------------------------------------------------------|-------|
| <b>Figure S1.</b> HRESIMS spectrum (MeOH) of compound <b>1</b> .....                                           | S-3   |
| <b>Figure S2.</b> $^1\text{H}$ NMR spectrum ( $\text{CD}_3\text{OD}$ , 500 MHz) of compound <b>1</b> .....     | S-3   |
| <b>Figure S3.</b> $^{13}\text{C}$ NMR spectrum ( $\text{CD}_3\text{OD}$ , 125 MHz) of compound <b>1</b> .....  | S-4   |
| <b>Figure S4.</b> $^{13}\text{C}$ NMR spectrum ( $\text{CD}_3\text{OD}$ , 125 MHz) of compound <b>1</b> .....  | S-4   |
| <b>Figure S5.</b> HMQC spectrum ( $\text{CD}_3\text{OD}$ , 500 MHz) of compound <b>1</b> .....                 | S-5   |
| <b>Figure S6.</b> HMBC spectrum ( $\text{CD}_3\text{OD}$ , 500 MHz) of compound <b>1</b> .....                 | S-5   |
| <b>Figure S7.</b> COSY spectrum ( $\text{CD}_3\text{OD}$ , 500 MHz) of compound <b>1</b> .....                 | S-6   |
| <b>Figure S8.</b> ROESY spectrum ( $\text{CD}_3\text{OD}$ , 500 MHz) of compound <b>1</b> .....                | S-6   |
| <b>Figure S9.</b> HRESIMS spectrum (MeOH) of compound <b>2</b> . ....                                          | S-7   |
| <b>Figure S10.</b> $^1\text{H}$ NMR spectrum ( $\text{CD}_3\text{OD}$ , 500 MHz) of compound <b>2</b> .....    | S-7   |
| <b>Figure S11.</b> $^{13}\text{C}$ NMR spectrum ( $\text{CD}_3\text{OD}$ , 125 MHz) of compound <b>2</b> ..... | S-8   |
| <b>Figure S12.</b> DEPT spectrum ( $\text{CD}_3\text{OD}$ , 125 MHz) of compound <b>2</b> .....                | S-8   |
| <b>Figure S13.</b> HMQC spectrum ( $\text{CD}_3\text{OD}$ , 500 MHz) of compound <b>2</b> .....                | S-9   |
| <b>Figure S14.</b> HMBC spectrum ( $\text{CD}_3\text{OD}$ , 500 MHz) of compound <b>2</b> .....                | S-9   |
| <b>Figure S15.</b> COSY spectrum ( $\text{CD}_3\text{OD}$ , 500 MHz) of compound <b>2</b> .....                | S-10  |
| <b>Figure S16.</b> NOESY spectrum ( $\text{CD}_3\text{OD}$ , 500 MHz) of compound <b>2</b> .....               | S-10  |
| $^1\text{H}$ and $^{13}\text{C}$ NMR spectroscopic data of isolated compounds <b>3–5</b> and <b>7–12</b> ..... | S-11  |

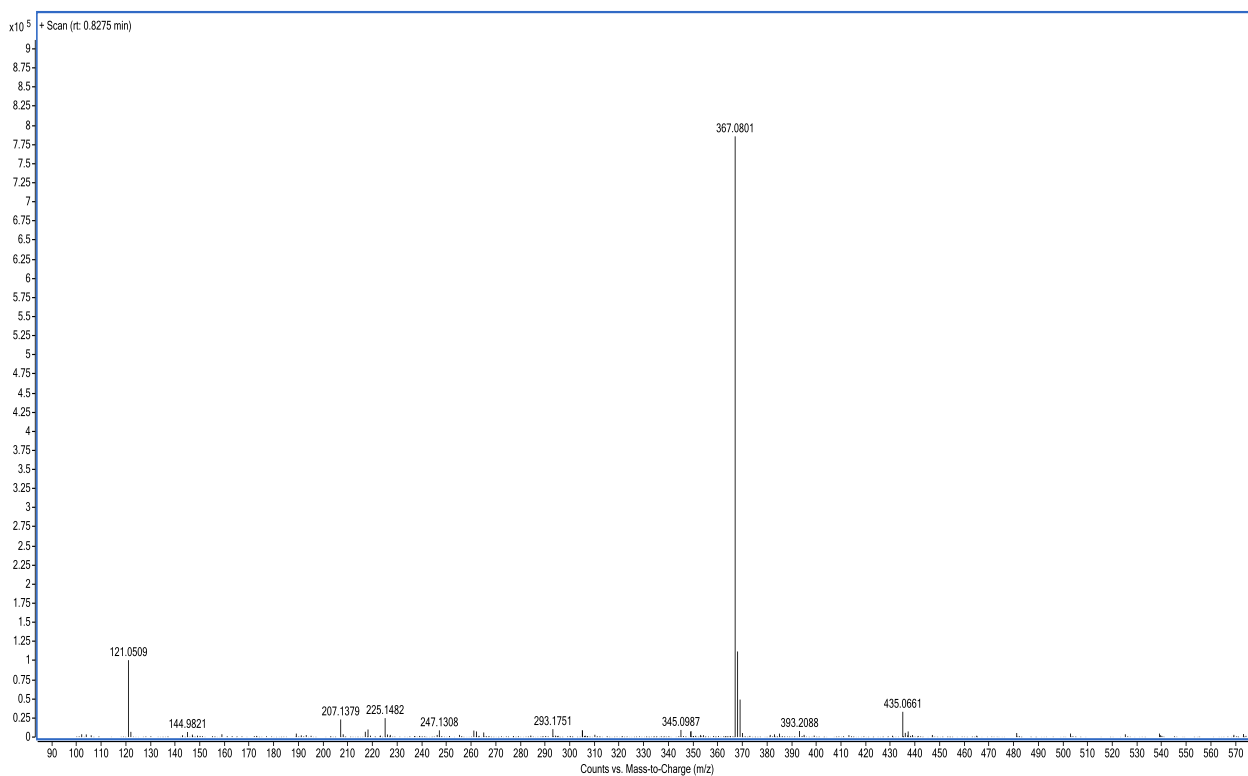

**Figure S1.** HRESIMS spectrum (MeOH) of compound **1**.

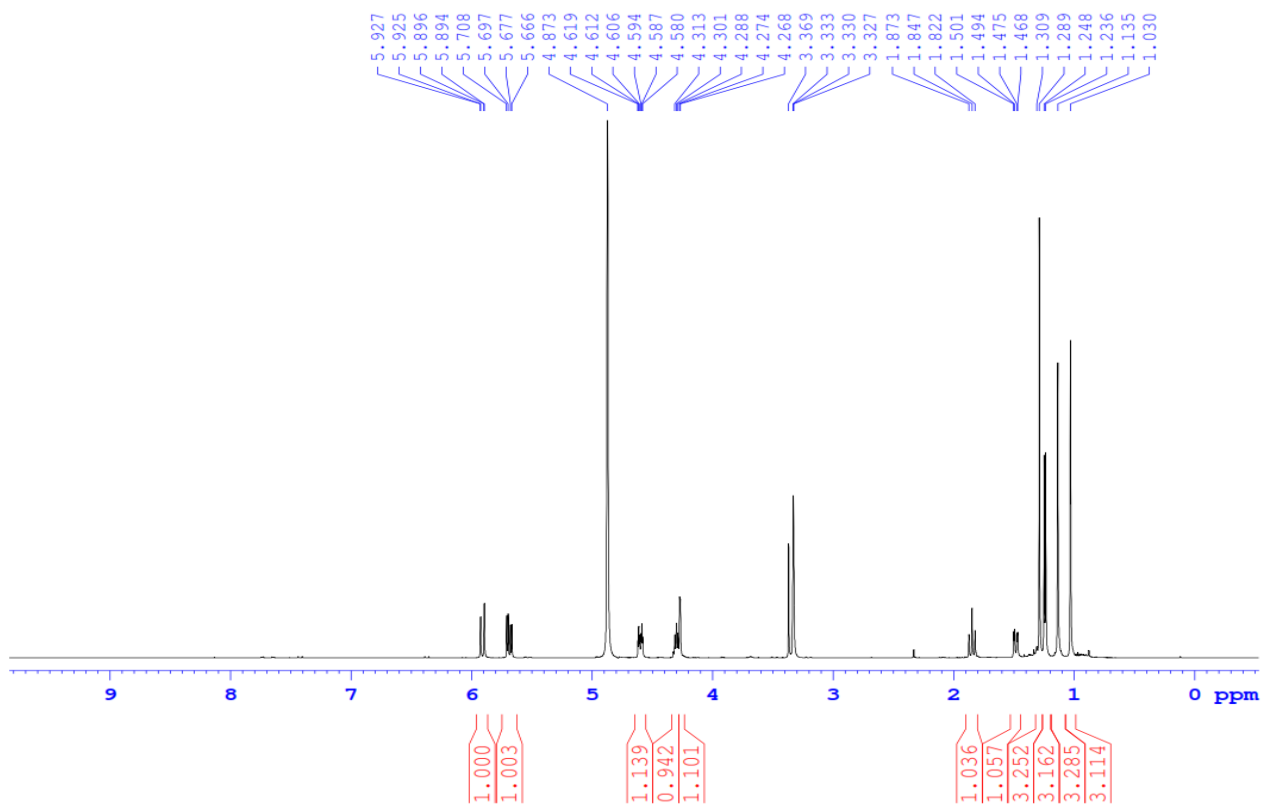

**Figure S2.** <sup>1</sup>H NMR spectrum (CD<sub>3</sub>OD, 500 MHz) of compound **1**.

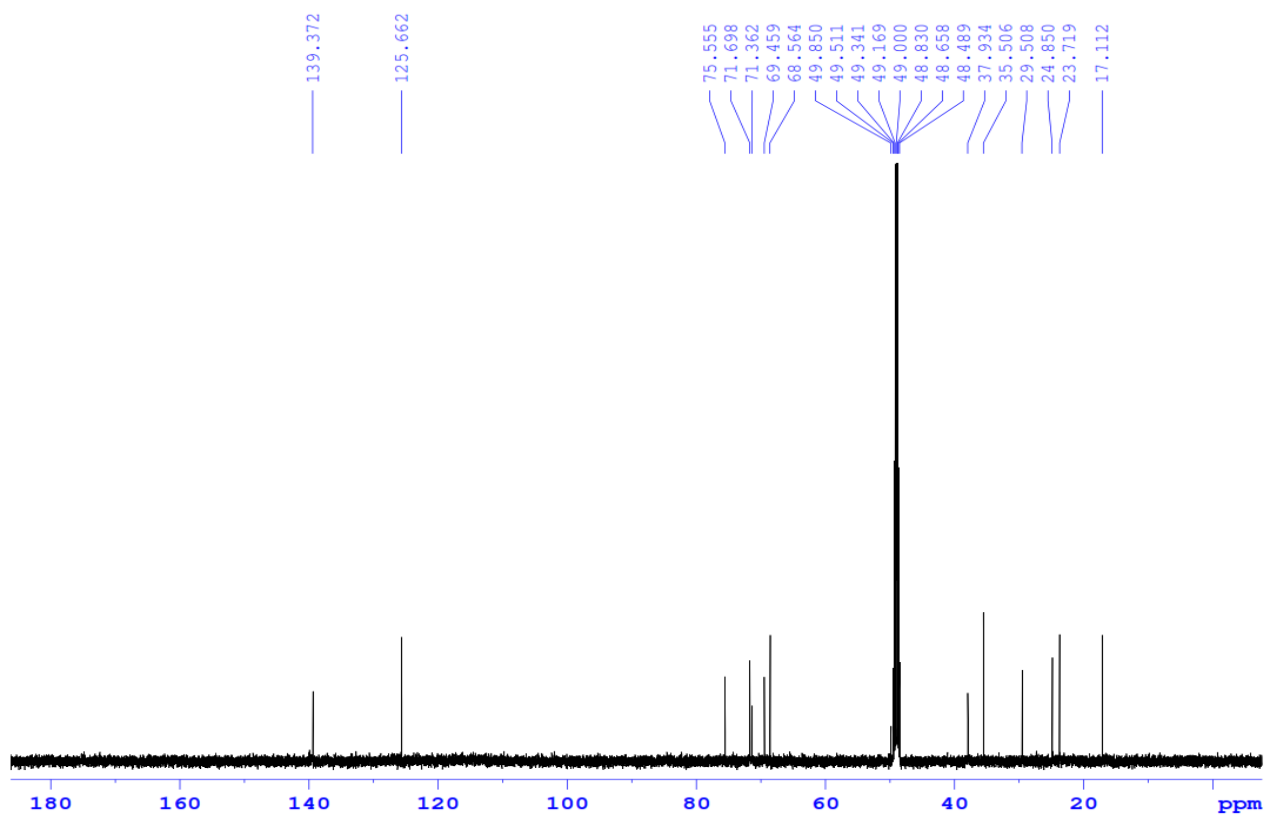

Figure S3.  $^{13}\text{C}$  NMR spectrum ( $\text{CD}_3\text{OD}$ , 125 MHz) of compound **1**.

DEPT90

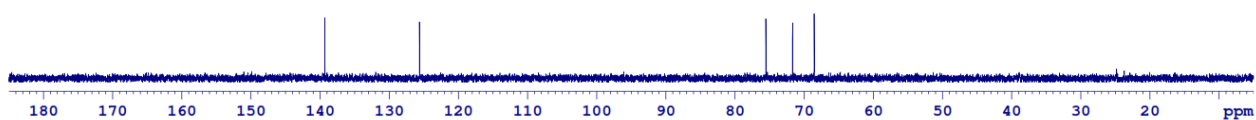

DEPT135

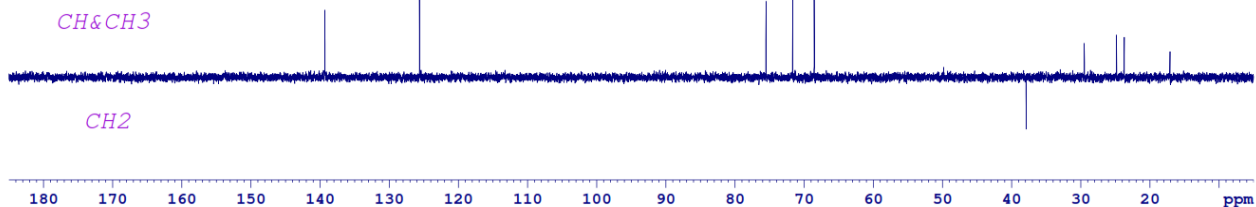

C13CPD

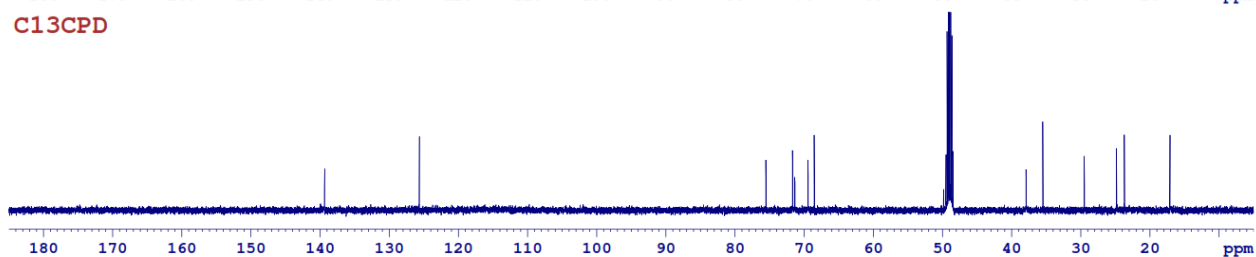

Figure S4. DEPT spectrum ( $\text{CD}_3\text{OD}$ , 125 MHz) of compound **1**.

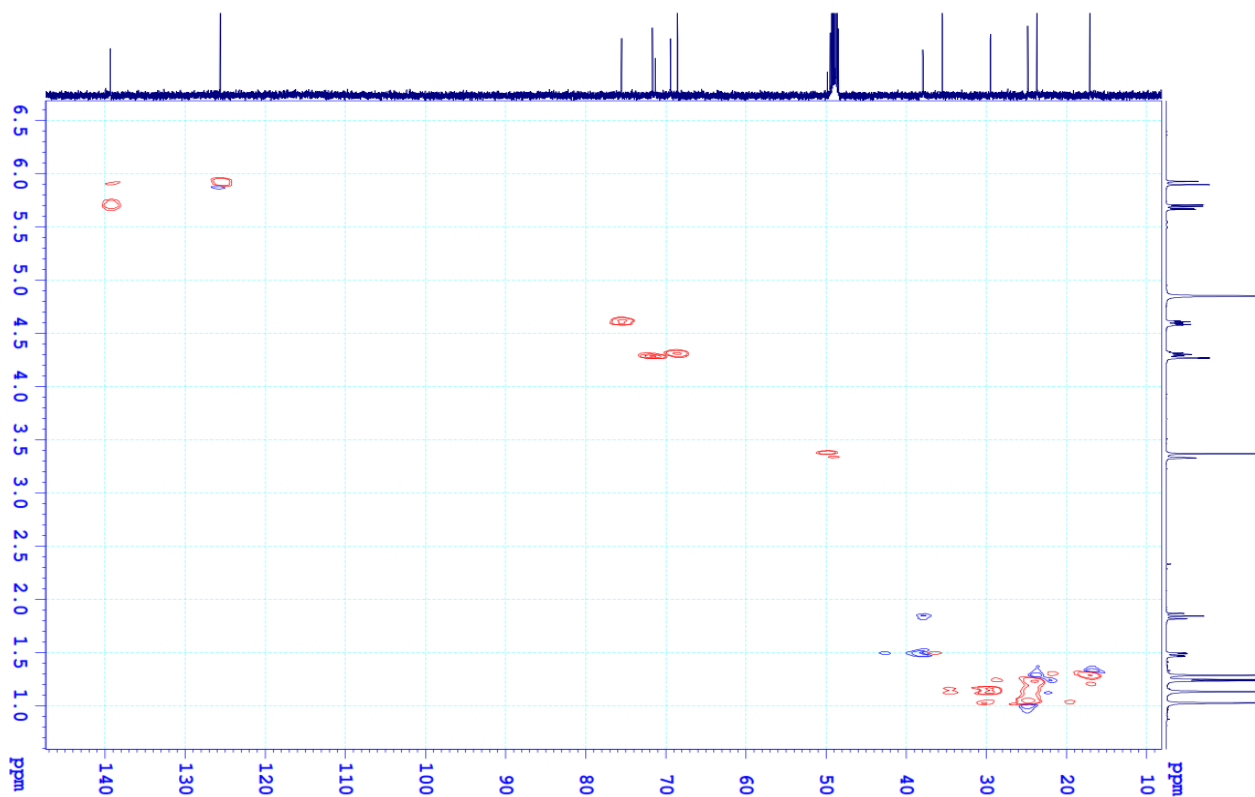

**Figure S5.** HMBC spectrum (CD<sub>3</sub>OD, 500 MHz) of compound **1**.

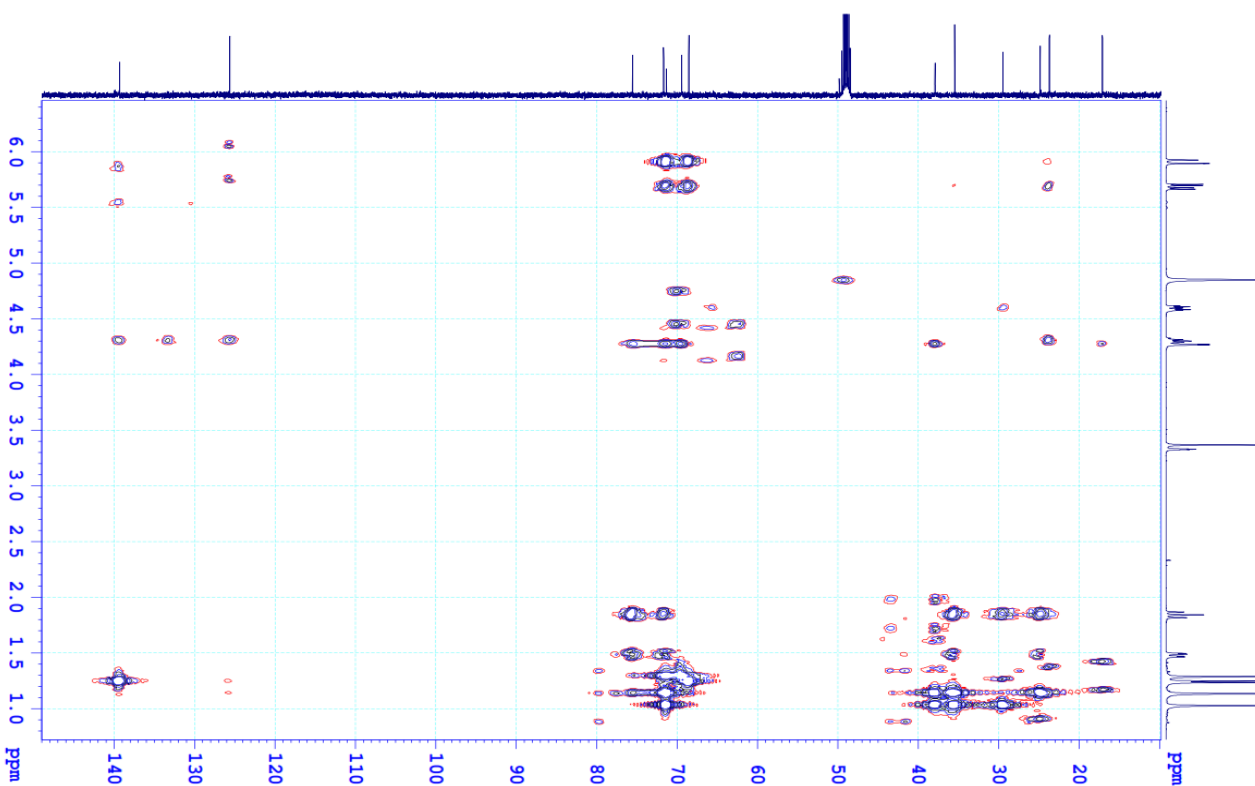

**Figure S6.** HMBC spectrum (CD<sub>3</sub>OD, 500 MHz) of compound **1**.

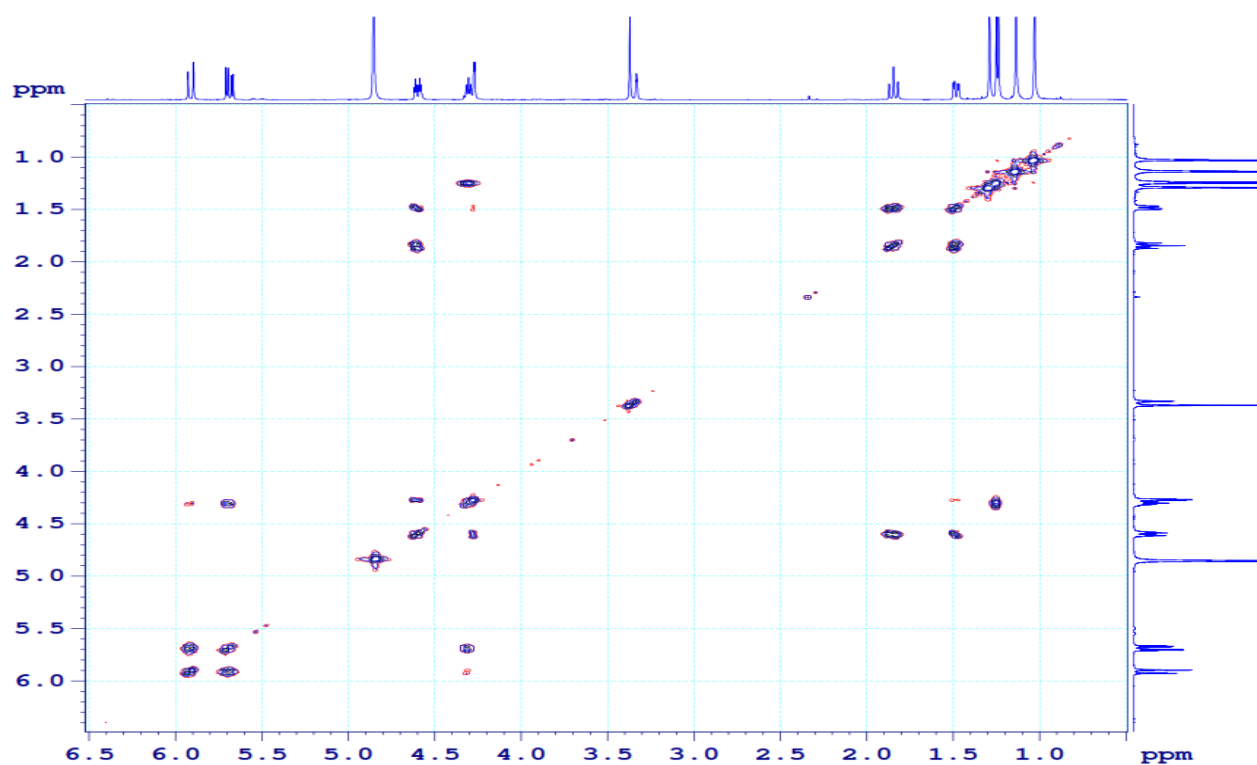

**Figure S7.** COSY spectrum (CD<sub>3</sub>OD, 500 MHz) of compound **1**.

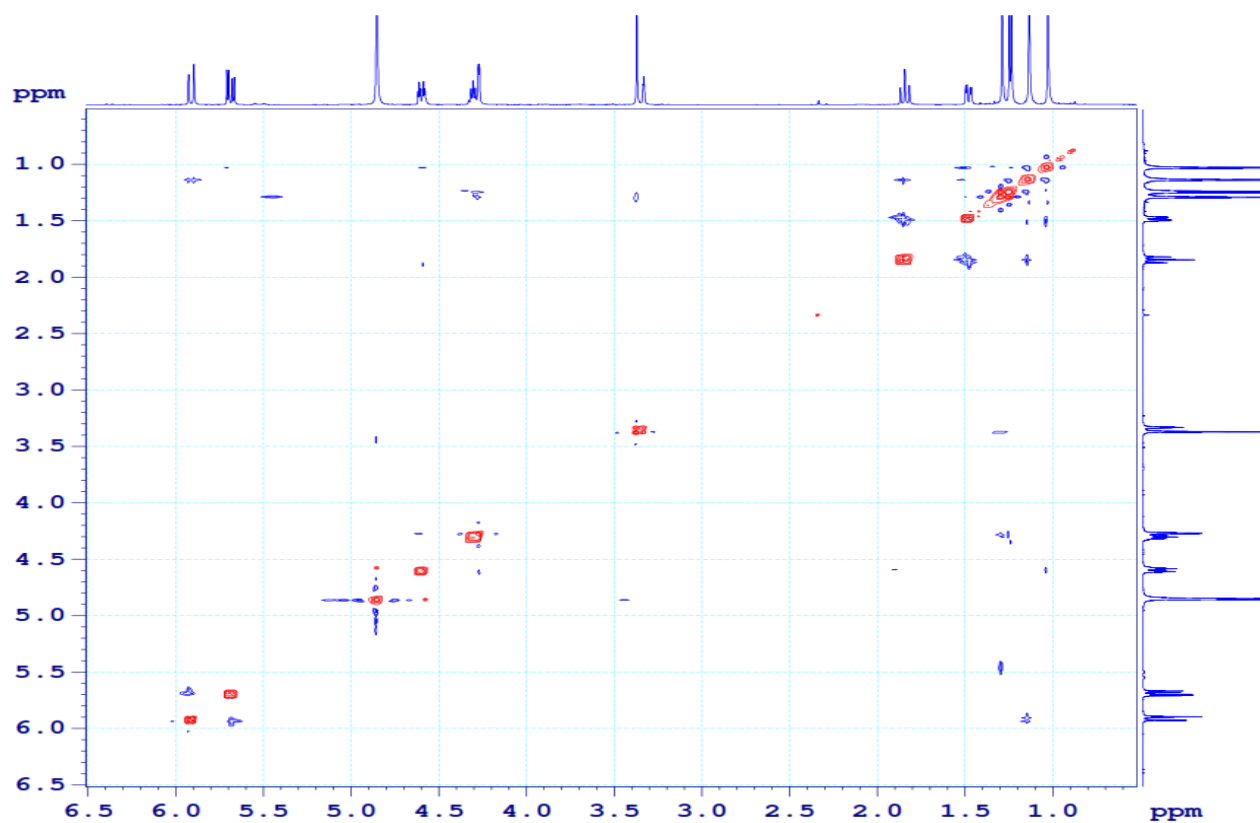

**Figure S8.** NOESY spectrum (CD<sub>3</sub>OD, 500 MHz) of compound **1**.

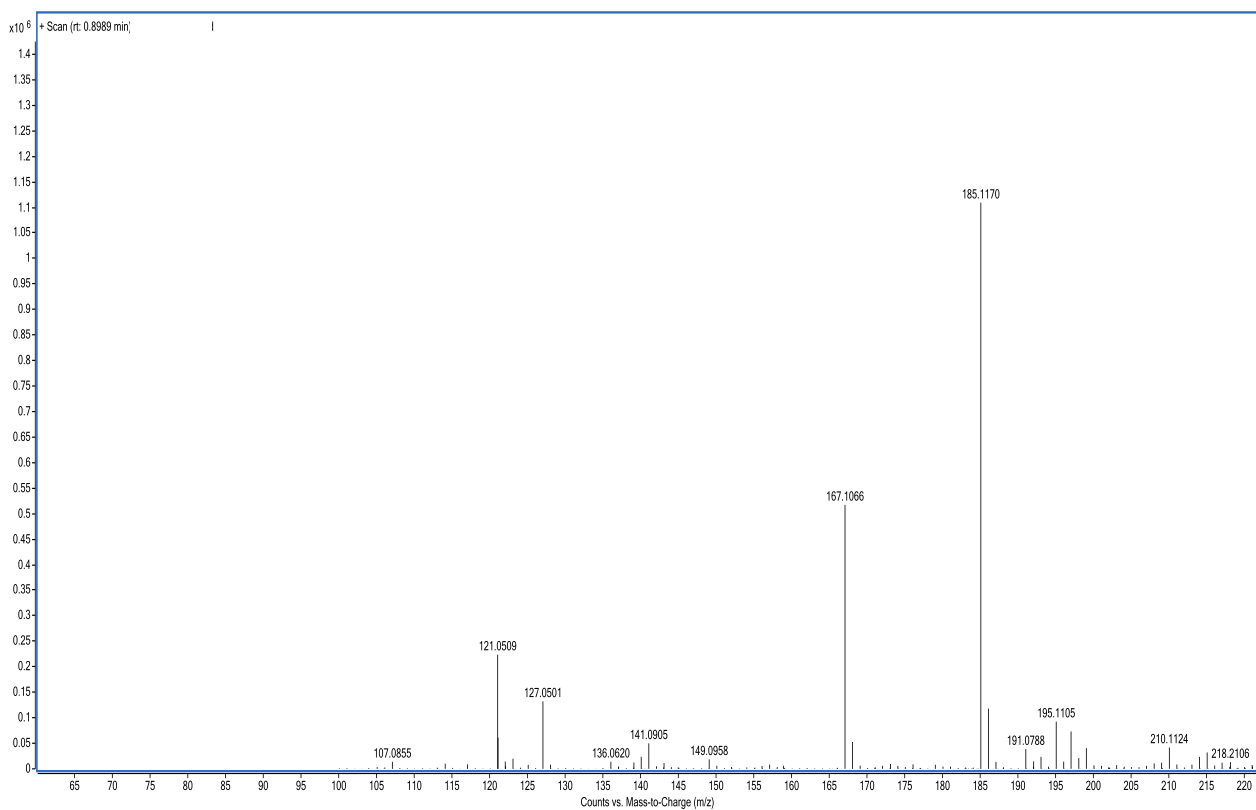

**Figure S9.** HRESIMS spectrum (MeOH) of compound **2**.

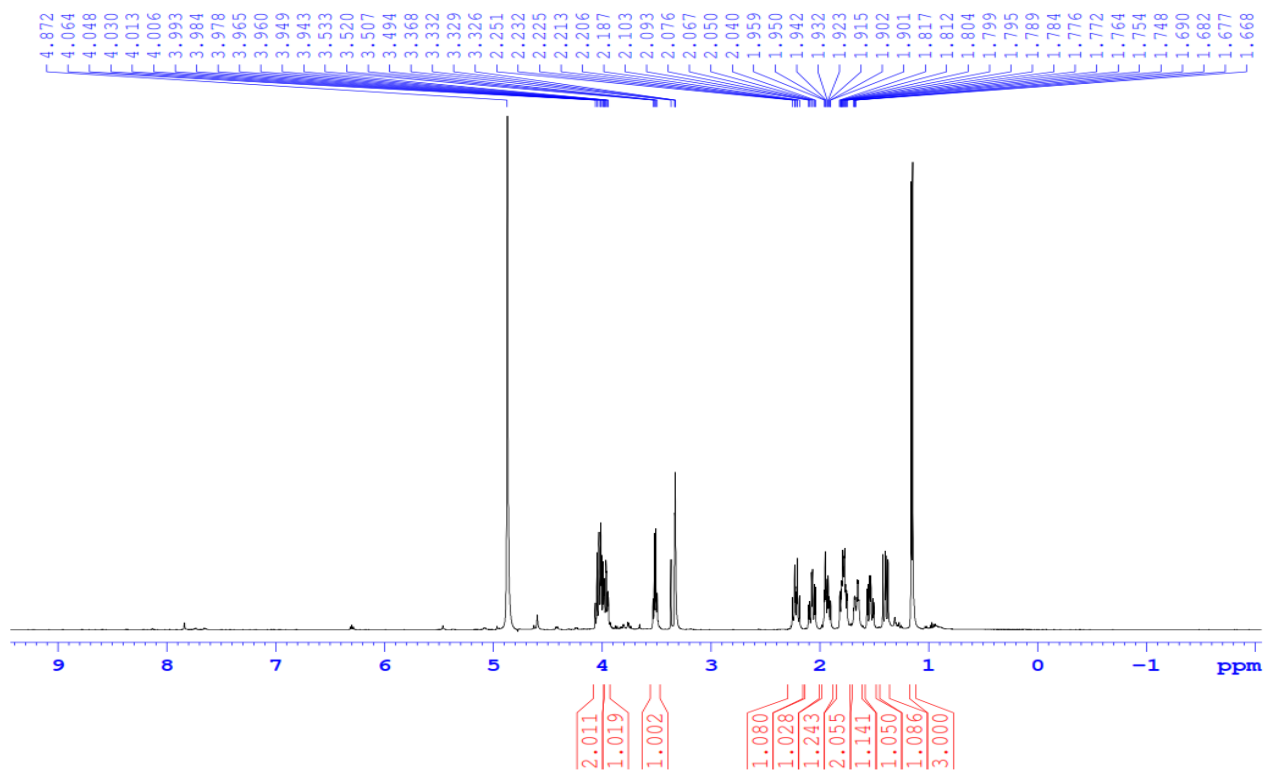

**Figure S10.** <sup>1</sup>H NMR spectrum (CD<sub>3</sub>OD, 500 MHz) of compound **2**.

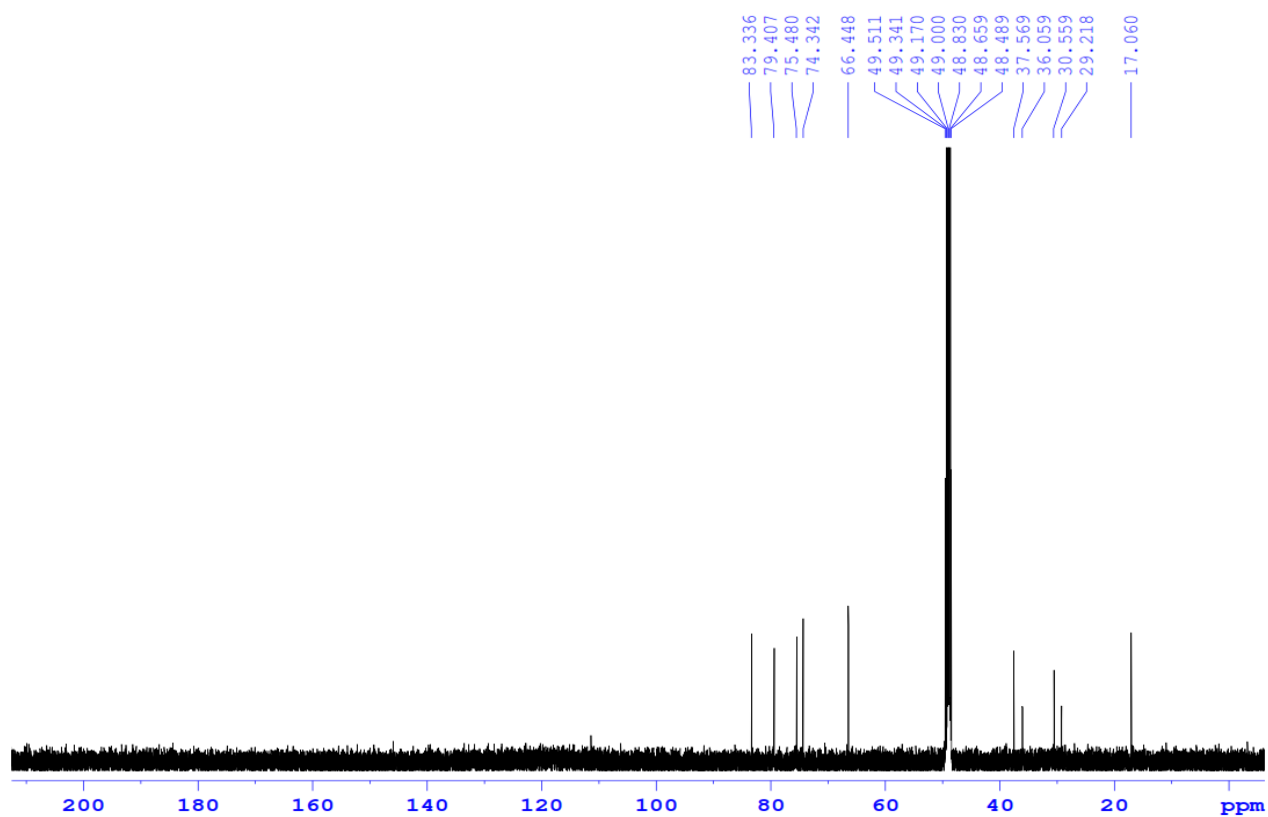

Figure S11. <sup>13</sup>C NMR spectrum (CD<sub>3</sub>OD, 125 MHz) of compound 2.

DEPT90

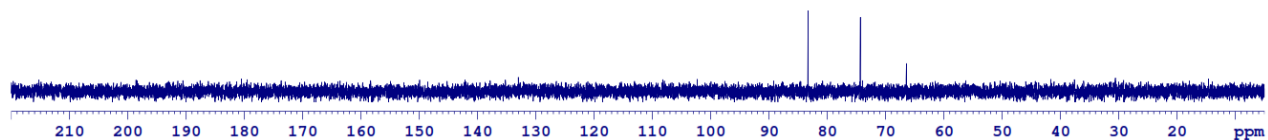

DEPT135

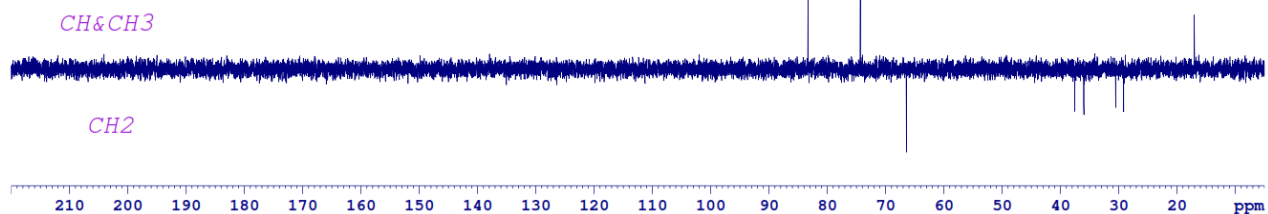

C13CPD

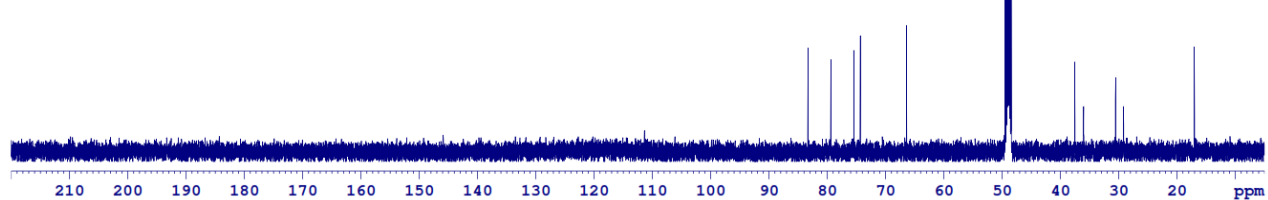

Figure S12. DEPT spectrum (CD<sub>3</sub>OD, 125 MHz) of compound 2.



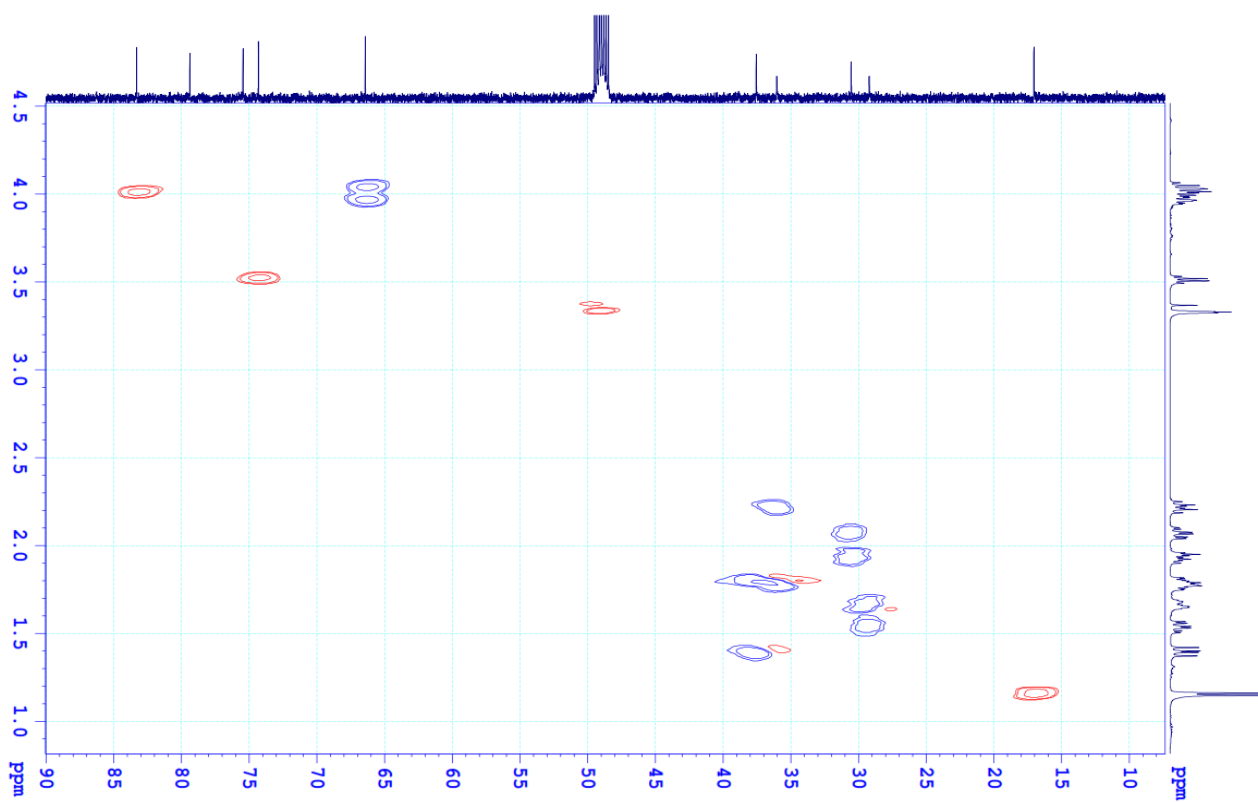

**Figure S13.** HMBC spectrum ( $\text{CD}_3\text{OD}$ , 500 MHz) of compound **2**.

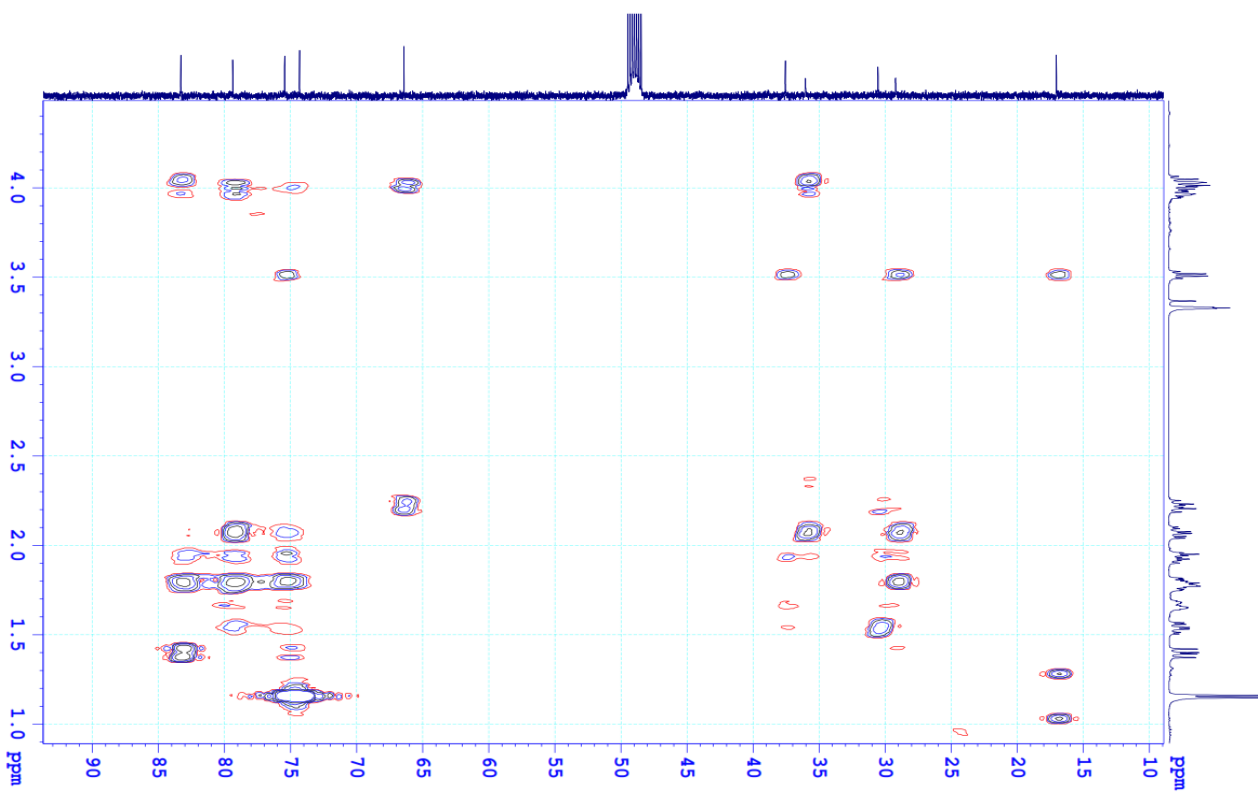

**Figure S14.** HMBC spectrum ( $\text{CD}_3\text{OD}$ , 500 MHz) of compound **2**.

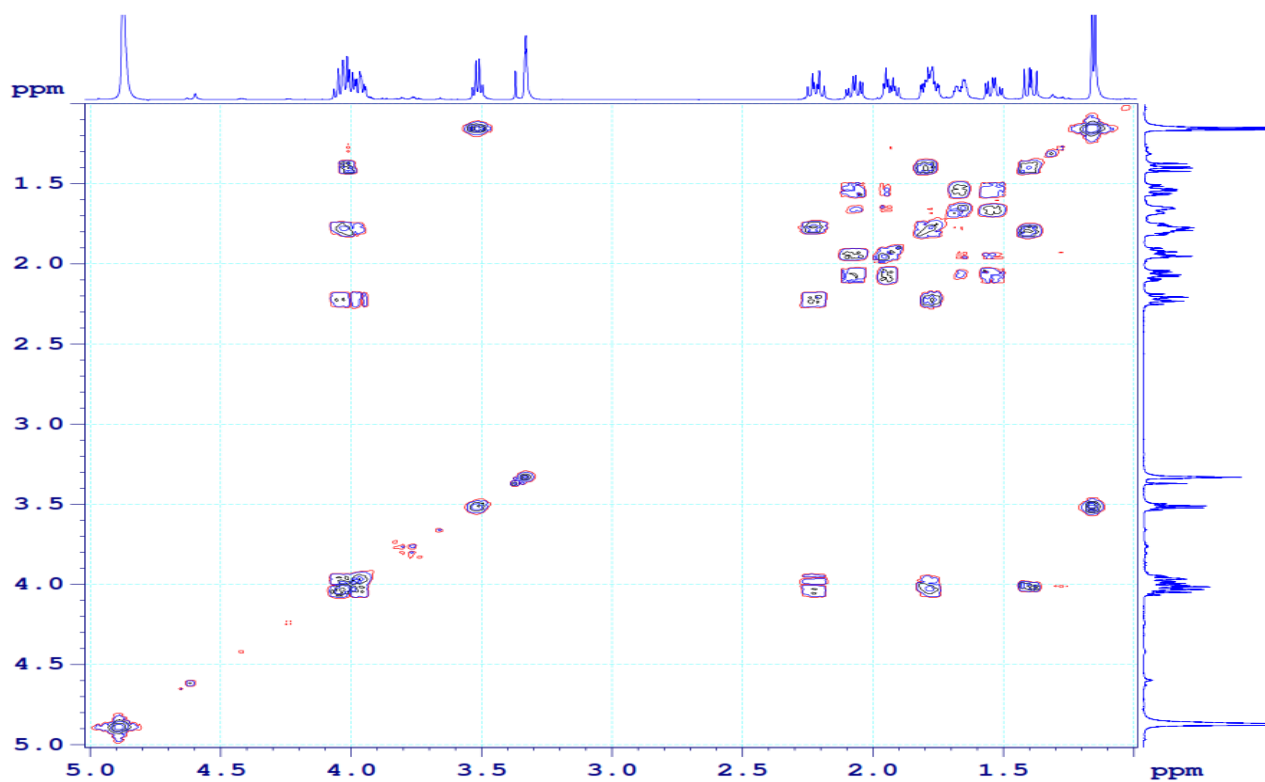

**Figure S15.** COSY spectrum (CD<sub>3</sub>OD, 500 MHz) of compound **2**.

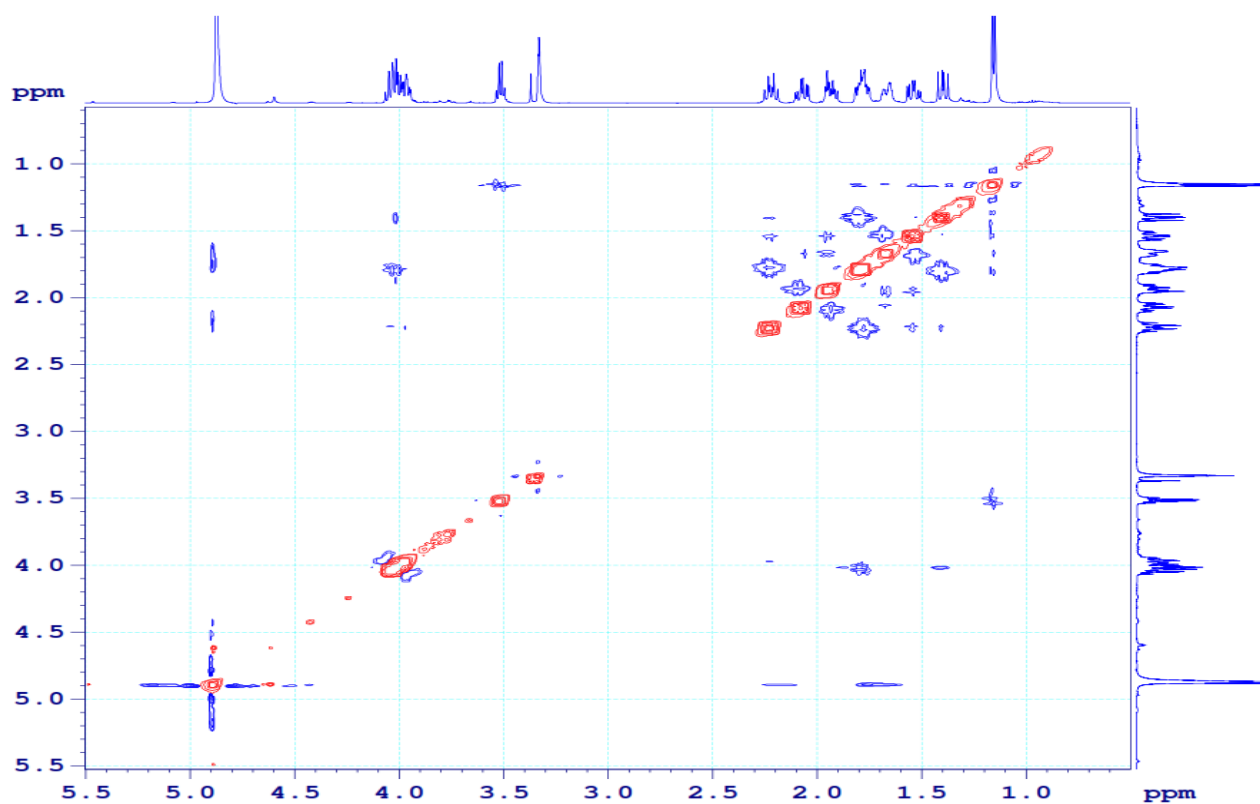

**Figure S16.** NOESY spectrum (CD<sub>3</sub>OD, 500 MHz) of compound **2**.

## **<sup>1</sup>H and <sup>13</sup>C NMR spectroscopic data of isolated compounds 3–5 and 7–12**

*Clerindicin E (3)*: Colorless oil;  $[\alpha]_D^{23} + 1.15^\circ$  (*c* 0.011, MeOH); IR (dry film)  $\nu_{\max}$  3300, 2950, 1430, 1270, 1170, 920, and 850  $\text{cm}^{-1}$ ; EIMS  $m/z$  158  $[\text{M}]^+$ , 140  $[\text{M} - \text{H}_2\text{O}]^+$ , and 122  $[\text{M} - 2\text{H}_2\text{O}]^+$ ; <sup>1</sup>H NMR (500 MHz, CD<sub>3</sub>OD):  $\delta_{\text{H}}$  1.97 (2H, m, H-3), 3.85 (2H, m, H-8), 3.93 (1H, m, H-2), and 3.95 (1H, m, H-4). <sup>13</sup>C NMR (125 MHz, CD<sub>3</sub>OD):  $\delta_{\text{C}}$  75.2 (C-1), 82.1 (C-2), 35.8 (C-3), 66.7 (C-4), 31.0 (C-5), 32.7 (C-6), 39.4 (C-7), and 66.0 (C-8).

*Rengyol (4)*: White solid; mp 124°C;  $[\alpha]_D^{23} + 0.8^\circ$  (*c* 0.01, MeOH); <sup>1</sup>H NMR (500 MHz, CD<sub>3</sub>OD):  $\delta_{\text{H}}$  1.39 – 1.75 (10H, m, H-2, H-3, H-5, H-6, and H-7), 3.75 (2H, t, *J* = 7.5 Hz, H-1), and 3.54 (1H, broad quintet, *J* = 5.0 Hz, H-1); <sup>13</sup>C NMR (125 MHz, CD<sub>3</sub>OD):  $\delta_{\text{C}}$  70.7 (C-1), 36.0 (C-2), 31.8 (C-3), 70.7 (C-4), 31.2 (C-5), 36.0 (C-6), 45.5 (C-7), and 59.1 (C-8).

*Cornoside (5)*: Brown oil;  $[\alpha]_D^{23} -19.5^\circ$  (*c* 1.5, EtOH); <sup>1</sup>H NMR (500 MHz, CD<sub>3</sub>OD):  $\delta_{\text{H}}$  2.07 (2H, t, *J* = 6.5 Hz, H-7), 3.16 – 3.69 (6H, H-2', H-3', H-4', H-5', and H-6'), 3.87 (1H, dt, *J* = 6.5 Hz, H-8a), 4.01 (1H, dt, *J* = 6.5 Hz, H-8b), 4.24 (1H, d, *J* = 8.0 Hz, H-1'), 6.14 (2H, dd, *J* = 8.0, 1.5 Hz, H-2 and H-6), and 7.04 (2H, dd, *J* = 8.0, 1.5 Hz, H-3 and H-5); <sup>13</sup>C NMR (125 MHz, CD<sub>3</sub>OD):  $\delta_{\text{C}}$  69.3 (C-1), 154.4 (C-2), 127.9 (C-3), 188.0 (C-4), 127. (C-5), 154.4 (C-6), 41.0 (C-7), 65.7 (C-8), 104.3 (C-1'), 75.0 (C-2'), 78.5 (C-3'), 71.6 (C-4'), 77.9 (C-5'), and 62.7 (C-6').

*Jaceosidin (7)*: Pale yellow crystals; mp 259 - 260°C; <sup>1</sup>H NMR (500 MHz, DMSO-*d*<sub>6</sub>):  $\delta_{\text{H}}$  3.75 (3H, s, 6-OCH<sub>3</sub>), 3.88 (3H, s, 3'-OCH<sub>3</sub>), 6.60 (1H, s, H-8), 6.86 (1H, s, H-3), 7.54 (1H, br s, H-2'); 6.92 (1H, d, *J* = 9.0 Hz, H-5'), and 7.53 (1H, br d, *J* = 9.0 Hz, H-6'); <sup>13</sup>C NMR (125 MHz, DMSO-*d*<sub>6</sub>):  $\delta_{\text{C}}$  164.0 (C-2), 103.0 (C-3), 182.4 (C-4), 153.0 (C-5), 131.6 (C-6), 157.5 (C-7), 94.6 (C-8), 152.7 (C-9), 104.4 (C-10), 121.8 (C-1'), 110.4 (C-2'), 148.3 (C-3'), 151.0 (C-4'), 116.0 (C-5'), 120.6 (C-6'), 56.2 (3'-OCH<sub>3</sub>), and 60.2 (6-OCH<sub>3</sub>).

*Pomonic acid (8)*: Crystalline powder;  $[\alpha]_D^{23} + 50.0^\circ$  (*c* 0.02, CHCl<sub>3</sub>); mp 202 - 203°C; <sup>1</sup>H NMR (500 MHz, CD<sub>3</sub>OD):  $\delta_{\text{H}}$  0.88 (3H, s, H-26), 0.95 (3H, d, *J* = 6.5 Hz, H-30), 1.04 (1H, m, H-

15b), 1.07 (3H, s, H-24), 1.10 (3H, s, H-25), 1.11 (3H, s, H-23), 1.21 (3H, s, H-29), 1.27 (1H, m, H-2b), 1.36 (1H, m, H-20), 1.37 (3H, s, H-27), 1.41 (1H, m, H-5), 1.41 (1H, m, H-7b), 1.48 (1H, m, H-22b), 1.54 (1H, m, H-6), 1.56 (1H, m, H-16b), 1.63 (1H, m, H-7a), 1.64 (1H, m, H-1a), 1.74 (1H, m, H-2a), 1.76 (1H, m, H-1b), 1.82 (1H, m, H-9), 1.84 (1H, m, H-15a), 1.94 (1H, m, H-22a), 2.07 (2H, dd,  $J = 3.5, 8.0$  Hz, H-11), 2.40 (1H, m, H-21b), 2.53 (1H, s, H-18), 2.60 (1H, m, H-16a), 2.62 (1H, m, H-21a), and 5.32 (1H, t,  $J = 3.5$  Hz, H-12);  $^{13}\text{C}$  NMR (125 MHz,  $\text{CD}_3\text{OD}$ ):  $\delta_{\text{C}}$  38.9 (C-1), 27.2 (C-2), 220.5 (C-3), 48.5 (C-4), 56.6 (C-5), 20.8 (C-6), 33.7 (C-7), 41.0 (C-8), 47.7 (C-9), 37.8 (C-10), 24.7 (C-11), 129.2 (C-12), 140.0 (C-13), 42.7 (C-14), 29.6 (C-15), 26.6 (C-16), 49.2 (C-17), 55.1 (C-18), 73.5 (C-19), 43.0 (C-20), 35.1 (C-21), 40.2 (C-22), 27.0 (C-23), 21.9 (C-24), 15.4 (C-25), 17.3 (C-26), 24.6 (C-27), 182.5 (C-28), 27.1 (C-29), and 16.5 (C-30).

*Pomolic acid* (**9**): Crystalline powder;  $[\alpha]_D^{23} + 22.6^\circ$  ( $c$  0.01,  $\text{CHCl}_3$ );  $^1\text{H}$  NMR (500 MHz,  $\text{CD}_3\text{OD}$ ):  $\delta_{\text{H}}$  0.81 (3H, s, H-26), 0.86 (3H, s, H-24), 0.94 (3H, d,  $J = 6.5$  Hz, H-30), 0.95 (3H, s, H-23), 0.97 (3H, s, H-25), 1.03 (1H, m, H-15b), 1.21 (3H, s, H-29), 1.26 (1H, m, H-21b), 1.34 (1H, m, H-7b), 1.35 (1H, m, H-5), 1.38 (3H, s, H-27), 1.39 (1H, m, H-20), 1.40 (1H, m, H-1b), 1.42 (1H, m, H-6b), 1.46 (1H, m, H-6a), 1.55 (1H, m, H-2b), 1.64 (1H, m, H-7a), 1.65 (1H, m, H-1a), 1.66 (1H, m, H-22b), 1.72 (1H, m, H-21a), 1.76 (1H, m, H-22a), 1.82 (1H, m, H-15a), 1.88 (1H, m, H-9), 1.98 (1H, m, H-11b), 2.00 (1H, m, H-2a), 2.03 (1H, m, H-11a), 2.52 (1H, s, H-18), 2.60 (2H, m, H-16), 3.36 (1H, d,  $J = 5.0$ , H-3), and 5.31 (1H, br t,  $J = 3.5$  Hz, H-12);  $^{13}\text{C}$  NMR (125 MHz,  $\text{CD}_3\text{OD}$ ):  $\delta_{\text{C}}$  34.2 (C-1), 26.2 (C-2), 76.9 (C-3), 38.3 (C-4), 50.0 (C-5), 19.4 (C-6), 34.1 (C-7), 41.2 (C-8), 48.2 (C-9), 38.1 (C-10), 24.6 (C-11), 129.5 (C-12), 139.9 (C-13), 42.7 (C-14), 29.5 (C-15), 26.6 (C-16), 49.5 (C-17), 55.1 (C-18), 73.6 (C-19), 43.0 (C-20), 27.2 (C-21), 39.0 (C-22), 29.0 (C-23), 22.9 (C-24), 15.7 (C-25), 17.5 (C-26), 24.8 (C-27), 182.5 (C-28), 27.0 (C-29), and 16.5 (C-30).
